# Supplementary material for: A Membrane-Type-1 Matrix Metalloproteinase (MT1-MMP) – Discoidin Domain Receptor 1 Axis Regulates Collagen-Induced Apoptosis in Breast Cancer Cells
Source: PubMed Central journal article supplement (PMC4638154; doi:10.1371/journal.pone.0116006), 2015-03-16

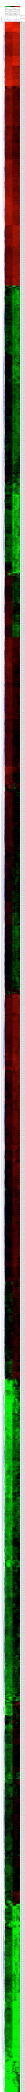

Supplement: pone.0116006.s002.pdf [file pone.0116006.s002.pdf]
